# Supplementary material
Source: bioRxiv or medRxiv preprint supplement (https://medrxiv.org/highwire/filestream/89862/field_highwire_adjunct_files/0/2020.07.15.20152645-1.pdf)
Supplement: Supplementary file [file 2020.07.15.20152645-1.pdf]

## Supplementary Information

### *Understanding Society Sampling Strategy*

The GPS comprises two separate postcode samples, one for England, Scotland and Wales, and the other sampling Northern Ireland. The GPS used a clustered postcode sector design, firstly random selecting postcode sectors to become the primary sampling units (PSUs) for the study. After stratifying PSUs on geographical region, proportion of non-manual workers, population density, and ethnic minority density, a systematic random sample was carried out to select PSUs in the GPS, and data collection carried out systematically on the 2,640 PSUs over 24 months (Lynn and Knies, 2016). A further 2,395 randomly selected postcodes were included in the Northern Irish sample. The EMBS consists of a further 771 sectors selected for their relatively high proportions of ethnic minority groups and expected household yield (Berthoud *et al.*, 2009).

### *Modelling Procedure*

Starting values were obtained using Iterative Generalised Least Squares estimation, however starting values for cross-classified levels had to be manually specified, and thus area-classification residuals were specified to initially be orthogonal with variances of 0.01. All models were specified to have uniform, uninformative prior distributions. Models were run initially for 100,000 iterations after a discarded burn-in of 50,000 iterations. Model coefficients were then checked and if necessary, the model run was extended to achieve adequate estimated sample size (250) for all random parameters. Added model coefficients were retained if their introduction to the model induced significant reduction in DIC which was significant when evaluated against a chi-square distribution given the complexity introduced by added coefficients (Spiegelhalter *et al.*, 2002). Models including the complex age terms were run for 500,000 iterations post burn-in before following this same procedure.

### *Interpretation of Bayesian Credible Intervals*

95% credible intervals are presented for VPCs, which should not be interpreted as standard errors from which to infer traditional significance, as these are estimated from MCMC chains. Credible intervals are the 2.5<sup>th</sup> and 97.5<sup>th</sup> quantiles of the posterior sampling distribution generated by the MCMC chains. Within any one iteration the variance estimate must be positive, meaning VPCs cannot span zero. Conversely, correlation estimate credible intervals can be interpreted as evidence of a non-zero value. As with the VPC estimates, these are calculated from estimates in a given iteration, and then quantiles are presented. As such these estimates are necessarily bounded by -1 and 1.

Supplementary Table 1: Demographic differences between 40452 partial GHQ-12 respondents and 37836 GHQ-12 and SWE respondents

| Variables                                         | GHQ-12 Partial respondents (N = 40452) |                                      | Full GHQ-12+SWE Respondents (N = 37836) |                                      |
|---------------------------------------------------|----------------------------------------|--------------------------------------|-----------------------------------------|--------------------------------------|
| <i>Responses</i>                                  |                                        |                                      |                                         |                                      |
| <i>GHQ-12</i>                                     | Mean = 11.05                           | SD = 5.36                            | Mean = 11.03                            | SD = 5.33                            |
| <i>SWE</i>                                        |                                        |                                      | Mean = 12.62                            | SD = 5.83                            |
| <i>Individual Level Variables</i>                 |                                        |                                      |                                         |                                      |
| Age                                               | Mean = 45.83                           | SD = 18.02                           | Mean = 45.36                            | SD = 17.76                           |
| Sex                                               | <i>Female</i> 56.2%                    | <i>Male</i> 43.8%                    | <i>Female</i> 56.0%                     | <i>Male</i> 44.0%                    |
| Marital Status                                    | <i>Married</i> 51.0%                   | <i>Single</i> 31.5%                  | <i>Married</i> 51.1%                    | <i>Single</i> 31.9%                  |
| Ethnicity                                         | SWD 17.5%                              |                                      | SWD 17.1%                               |                                      |
|                                                   | <i>White</i> 83.1%                     | <i>Black</i> 4.6%                    | <i>White</i> 83.8%                      | <i>Black</i> 4.1%                    |
|                                                   | <i>Asian</i> 9.1%                      | <i>Mixed</i> 3.3%                    | <i>Asian</i> 7.7%                       | <i>Mixed</i> 3.2%                    |
| Job Classification                                | <i>Not in Employment</i> 43.5%         | <i>Professional</i> 3.6%             | <i>Not in Employment</i> 42.3%          | <i>Professional</i> 3.7%             |
|                                                   | <i>Managerial/Technical</i> 20.9%      | <i>Skilled Non-Manual</i> 12.6%      | <i>Managerial/Technical</i> 21.7%       | <i>Skilled Non-Manual</i> 13.0%      |
|                                                   | <i>Skilled Manual</i> 9.0%             | <i>Partly Skilled</i> 8.2%           | <i>Skilled Manual</i> 9.1%              | <i>Partly Skilled</i> 8.3%           |
|                                                   | <i>Unskilled</i> 1.9%                  |                                      | <i>Unskilled</i> 1.9%                   |                                      |
| Educational Attainment                            | <i>Higher Education</i> 33.8%          | <i>A-Level</i> 19.1%                 | <i>Higher Education</i> 34.8%           | <i>A-Level</i> 21.1%                 |
|                                                   | <i>GCSE</i> 20.9%                      | <i>Other</i> 5.0%                    | <i>GCSE</i> 19.6%                       | <i>Other</i> 4.9%                    |
|                                                   | <i>None</i> 21.2%                      |                                      | <i>None</i> 19.6%                       |                                      |
| <i>Household Level Variables</i> 25181 Households |                                        |                                      |                                         |                                      |
| Housing Tenure                                    | <i>Mortgaged</i> 38.2%                 | <i>Owned Outright</i> 28.7%          | <i>Mortgaged</i> 39.4%                  | <i>Owned Outright</i> 28.3%          |
|                                                   | <i>Local Authority Rented</i> 10.4%    | <i>Housing Authority Rented</i> 6.9% | <i>Local Authority Rented</i> 9.9%      | <i>Housing Authority Rented</i> 6.6% |
|                                                   | <i>Privately Rented</i> 15.1%          | <i>Other</i> 0.7%                    | <i>Privately Rented</i> 14.9%           | <i>Other</i> 0.9%                    |

Supplementary Table 2: Unadjusted, Complex Age, Random part model estimates (350,000 iterations).

| <b>350k Unadjusted Run</b>             | <b>Mean Estimate</b> | <b>Median</b> | <b>Cred Int 2.5%</b> | <b>Cred Int 97.5%</b> | <b>ESS</b> |
|----------------------------------------|----------------------|---------------|----------------------|-----------------------|------------|
| <b>Level: Area-Classification</b>      |                      |               |                      |                       |            |
| Var(cons.GHQ12)                        | 0.36943              | 0.35820       | 0.23028              | 0.57288               | 147207     |
| Covar(cons.SWE/cons.GHQ12)             | 0.48650              | 0.47216       | 0.30737              | 0.74774               | 173281     |
| Var(cons.SWE)                          | 0.67414              | 0.65457       | 0.42938              | 1.03183               | 176795     |
| Covar((Age-gm)^1.GHQ12/cons.GHQ12)     | 0.00352              | 0.00338       | 0.00082              | 0.00703               | 79935      |
| Covar((Age-gm)^1.GHQ12/cons.SWE)       | 0.00511              | 0.00491       | 0.00143              | 0.00991               | 80708      |
| Var((Age-gm)^1.GHQ12)                  | 0.00012              | 0.00011       | 0.00006              | 0.00021               | 72920      |
| Covar((Age-gm)^1.SWE/cons.GHQ12)       | 0.00292              | 0.00279       | -0.00024             | 0.00680               | 81751      |
| Covar((Age-gm)^1.SWE/cons.SWE)         | 0.00347              | 0.00332       | -0.00083             | 0.00862               | 79823      |
| Covar((Age-gm)^1.SWE/(Age-gm)^1.GHQ12) | 0.00006              | 0.00006       | 0.00001              | 0.00015               | 76301      |
| Var((Age-gm)^1.SWE)                    | 0.00016              | 0.00016       | 0.00009              | 0.00029               | 91785      |
| <b>Level: Region</b>                   |                      |               |                      |                       |            |
| Var(cons.GHQ12)                        | 0.07145              | 0.06598       | 0.03287              | 0.14227               | 131458     |
| Covar(cons.SWE/cons.GHQ12)             | 0.05529              | 0.05029       | 0.01628              | 0.12358               | 130293     |
| Var(cons.SWE)                          | 0.09874              | 0.09159       | 0.04741              | 0.19199               | 143765     |
| Covar((Age-gm)^1.GHQ12/cons.GHQ12)     | 0.00016              | 0.00014       | -0.00149             | 0.00193               | 148349     |
| Covar((Age-gm)^1.GHQ12/cons.SWE)       | 0.00033              | 0.00030       | -0.00154             | 0.00240               | 156988     |
| Var((Age-gm)^1.GHQ12)                  | 0.00014              | 0.00013       | 0.00007              | 0.00027               | 174403     |
| Covar((Age-gm)^1.SWE/cons.GHQ12)       | 0.00088              | 0.00081       | -0.00210             | 0.00431               | 214429     |
| Covar((Age-gm)^1.SWE/cons.SWE)         | 0.00041              | 0.00037       | -0.00320             | 0.00424               | 219803     |
| Covar((Age-gm)^1.SWE/(Age-gm)^1.GHQ12) | 0.00011              | 0.00010       | -0.00001             | 0.00029               | 226413     |
| Var((Age-gm)^1.SWE)                    | 0.00062              | 0.00058       | 0.00034              | 0.00111               | 245857     |
| <b>Level: PSU</b>                      |                      |               |                      |                       |            |
| Var(cons.GHQ12)                        | 0.15670              | 0.14990       | 0.06290              | 0.28986               | 400        |
| e                                      | 0.12026              | 0.11521       | 0.01980              | 0.24860               | 420        |
| Var(cons.SWE)                          | 0.24660              | 0.24051       | 0.10261              | 0.42647               | 474        |
| <b>Level: Household</b>                |                      |               |                      |                       |            |
| e                                      | 6.52681              | 6.52642       | 6.02135              | 7.03529               | 7754       |
| Covar(cons.SWE/cons.GHQ12)             | 5.73008              | 5.73100       | 5.27056              | 6.19074               | 9083       |
| Var(cons.SWE)                          | 7.12998              | 7.12918       | 6.53879              | 7.72811               | 5857       |
| <b>Level: Individual</b>               |                      |               |                      |                       |            |
| Var(cons.GHQ12)                        | 21.67128             | 21.66973      | 21.18001             | 22.17282              | 17795      |
| Covar(cons.SWE/cons.GHQ12)             | 12.89450             | 12.89340      | 12.45744             | 13.34203              | 21597      |
| Var(cons.SWE)                          | 26.14173             | 26.14033      | 25.54740             | 26.74432              | 15278      |

Supplementary Table 3: Random part estimates for final model with covariates and complex age term (500,000 iterations). Reference categories as in Table 5 – female, white, higher education, married, not in employment, house owned outright.

| <b>500k Adjusted Run</b>               | <b>Mean Estimate</b> | <b>Median</b> | <b>Cred Int 2.5%</b> | <b>Cred Int 97.5%</b> | <b>ESS</b> |
|----------------------------------------|----------------------|---------------|----------------------|-----------------------|------------|
| Level: Area Classification             |                      |               |                      |                       |            |
| Var(cons.GHQ12)                        | 0.01996              | 0.01844       | 0.00820              | 0.04030               | 38046      |
| Covar(cons.SWE/cons.GHQ12)             | 0.02975              | 0.02779       | 0.01201              | 0.05863               | 40172      |
| Var(cons.SWE)                          | 0.05542              | 0.05219       | 0.02494              | 0.10446               | 41250      |
| Covar((Age-gm)^1.GHQ12/cons.GHQ12)     | 0.00069              | 0.00065       | 0.00008              | 0.00157               | 41977      |
| Covar((Age-gm)^1.GHQ12/cons.SWE)       | 0.00120              | 0.00113       | 0.00021              | 0.00256               | 44253      |
| Var((Age-gm)^1.GHQ12)                  | 0.00008              | 0.00008       | 0.00004              | 0.00015               | 44518      |
| Covar((Age-gm)^1.SWE/cons.GHQ12)       | 0.00014              | 0.00012       | -0.00047             | 0.00083               | 39899      |
| Covar((Age-gm)^1.SWE/cons.SWE)         | 0.00013              | 0.00012       | -0.00089             | 0.00123               | 41161      |
| Covar((Age-gm)^1.SWE/(Age-gm)^1.GHQ12) | 0.00002              | 0.00002       | -0.00002             | 0.00006               | 43534      |
| Var((Age-gm)^1.SWE)                    | 0.00006              | 0.00006       | 0.00003              | 0.00012               | 45592      |
| Level: Region                          |                      |               |                      |                       |            |
| Var(cons.GHQ12)                        | 0.05006              | 0.04573       | 0.02103              | 0.10429               | 49030      |
| Covar(cons.SWE/cons.GHQ12)             | 0.04295              | 0.03879       | 0.01544              | 0.09368               | 48373      |
| Var(cons.SWE)                          | 0.05479              | 0.05001       | 0.02325              | 0.11378               | 48565      |
| Covar((Age-gm)^1.GHQ12/cons.GHQ12)     | 0.00042              | 0.00038       | -0.00106             | 0.00216               | 49701      |
| Covar((Age-gm)^1.GHQ12/cons.SWE)       | 0.00039              | 0.00034       | -0.00119             | 0.00219               | 48947      |
| Var((Age-gm)^1.GHQ12)                  | 0.00018              | 0.00017       | 0.00009              | 0.00034               | 52070      |
| Covar((Age-gm)^1.SWE/cons.GHQ12)       | 0.00059              | 0.00052       | -0.00083             | 0.00233               | 50248      |
| Covar((Age-gm)^1.SWE/cons.SWE)         | 0.00054              | 0.00048       | -0.00096             | 0.00232               | 51219      |
| Covar((Age-gm)^1.SWE/(Age-gm)^1.GHQ12) | 0.00004              | 0.00004       | -0.00004             | 0.00014               | 50052      |
| Var((Age-gm)^1.SWE)                    | 0.00017              | 0.00016       | 0.00008              | 0.00031               | 50460      |
| Level: PSU                             |                      |               |                      |                       |            |
| Var(cons.GHQ12)                        | 0.10651              | 0.09932       | 0.03215              | 0.22236               | 300        |
| Covar(cons.SWE/cons.GHQ12)             | 0.06009              | 0.05196       | -0.01237             | 0.16827               | 252        |
| Var(cons.SWE)                          | 0.13557              | 0.12473       | 0.03378              | 0.29145               | 260        |
| Level: Household                       |                      |               |                      |                       |            |
| Var(cons.GHQ12)                        | 5.79977              | 5.80188       | 5.30977              | 6.28062               | 9110       |
| Covar(cons.SWE/cons.GHQ12)             | 4.88642              | 4.88610       | 4.45310              | 5.31734               | 10408      |
| Var(cons.SWE)                          | 6.10820              | 6.10593       | 5.54319              | 6.68771               | 6135       |
| Level: Individual                      |                      |               |                      |                       |            |
| Var(cons.GHQ12)                        | 21.25361             | 21.25211      | 20.77385             | 21.73882              | 17613      |
| Covar(cons.SWE/cons.GHQ12)             | 12.78338             | 12.78307      | 12.35453             | 13.22179              | 19056      |
| Var(cons.SWE)                          | 26.10370             | 26.10181      | 25.51664             | 26.70489              | 14415      |

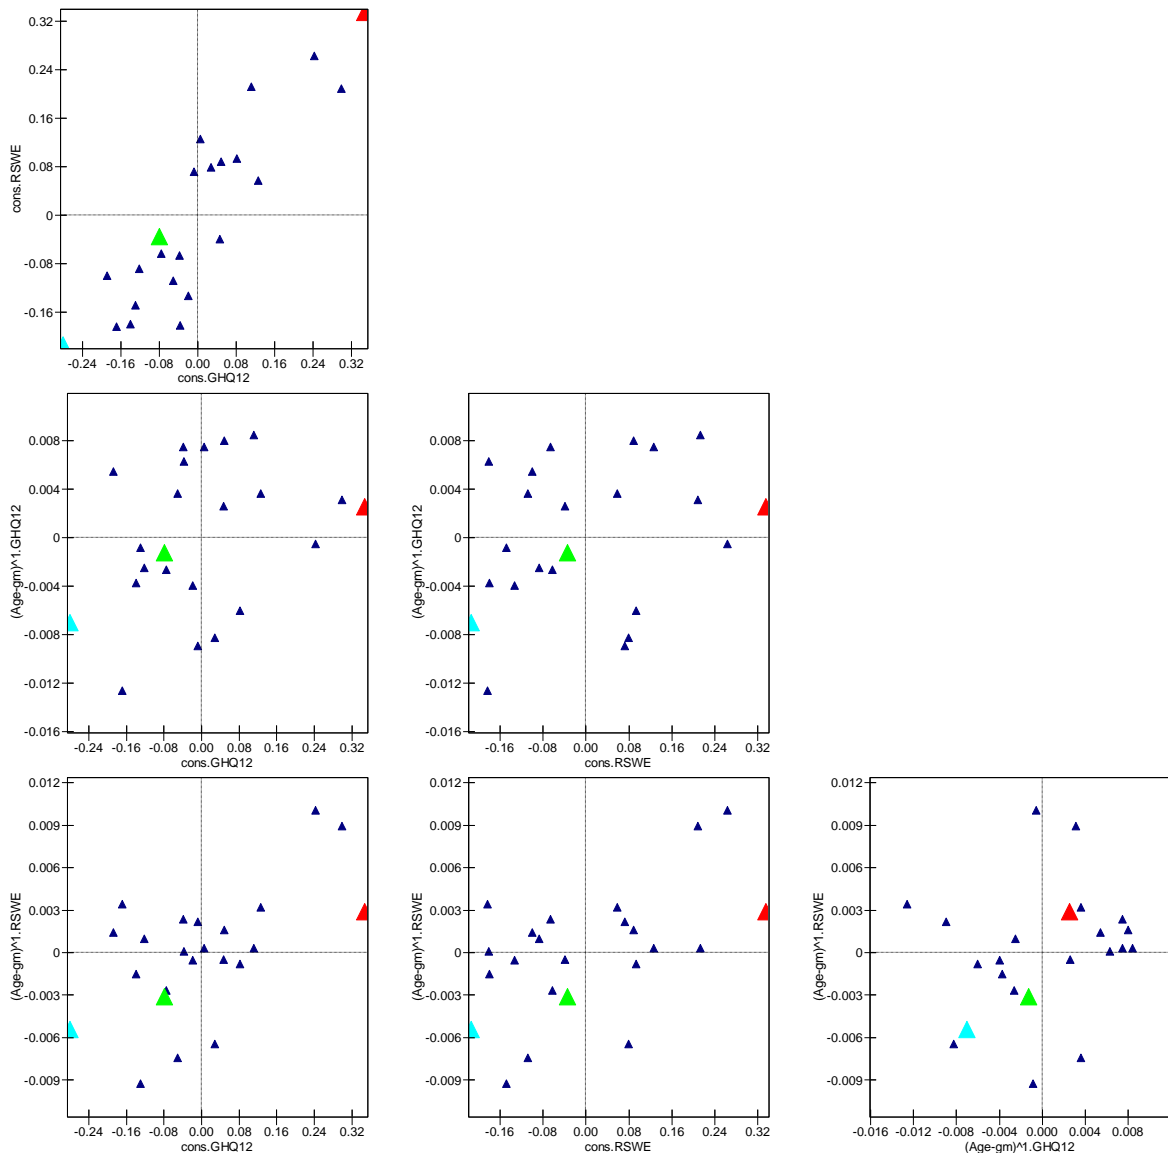

Supplementary Figure 1: Region level residuals for final model adjusted for covariates and complex age term. Highlighted regions demonstrate variation in random effects. Red = West Midlands Conurbation, Light Blue = Rest of Scotland, Green = West Yorkshire. Top to bottom, left to right. Fig 1a indicates regional residuals for the average respondent for GHQ-12 and SWE. Fig 1b gives regional residuals for GHQ-12 age slope and GHQ-12 intercept. Figure 1c gives regional residuals for GHQ-12 age slope and SWE intercept. Figure 1d gives regional residuals for SWE age slope and GHQ-12 intercept. Figure 1e gives regional residuals for SWE age slope and SWE intercept. Figure 1f gives regional residuals for SWE age slope and GHQ-12 age slope.

Supplementary Figure 1a illustrates the consensually poor mental health response in the West Midlands Conurbation (covering Birmingham and Coventry), the consensually good mental health response in the Rest of Scotland (Scotland excluding Strathclyde and East/Central Scotland), and the average mental health response in West Yorkshire. Figures 1b, 1c, 1d and 1e highlight positive covariance (evidenced in Supplementary Table 3) between response intercept and response age-slope, which indicates that areas with poorer mental health overall (on a given metric) tend to see steeper slopes of mental health decline with age. However, as seen in Supplementary Table 3 these are imprecisely estimated and as with complex variance functions in general, should not be interpreted in isolation. Interestingly, Fig 1f shows almost no pattern between regional residuals for age slopes across the two measures.
